# Supplementary material for: Effects of drought and salt stress on seed germination and seedling growth of Elymus nutans
Source: PeerJ. 2023 Aug 24;11:e15968. doi: 10.7717/peerj.15968 (PMC10460566; doi:10.7717/peerj.15968)
Supplement: Supplemental Information 1 [file peerj-11-15968-s001.xlsx]

## Sheet: Sheet1
Number of germination per day
PEG-6000
		MPa	day4			day5			day6			day7			day8			day9			day10			day11			day12
		0	22	21	23	27	28	25	30	31	32	35	38	37	39	42	40	39	42	40	39	42	40	39	42	40	39	42	40
		-0.04	19	18	17	23	26	25	28	29	27	33	32	31	36	38	36	36	38	36	36	38	36	36	38	36	36	38	36
		-0.14	18	18	19	22	21	22	28	27	25	31	33	30	32	35	31	32	35	31	32	35	31	32	35	31	32	35	31
		-0.29	16	15	14	19	18	18	21	25	23	28	26	29	29	27	30	29	27	30	29	27	30	29	27	30	29	27	30
		-0.49	8	9	11	12	14	15	18	17	16	19	20	21	20	21	23	23	22	25	23	22	25	23	22	25	23	22	25
		-0.73	6	7	8	9	10	9	13	12	11	15	14	13	17	15	14	17	15	14	17	15	14	17	15	14	17	15	14
		-1.02	5	4	3	6	5	6	12	16	15	13	17	18	18	19	19	20	23	19	20	23	19	20	23	19	20	23	19
NACL
		MPa	day4			day5			day6			day7			day8			day9			day10			day11			day12
		0	22	21	23	27	28	25	30	31	32	35	38	37	39	42	40	39	42	40	39	42	40	39	42	40	39	42	40
		-0.04	24	23	23	25	26	26	30	29	28	33	32	34	36	37	38	43	42	40	43	42	40	43	42	40	43	42	40
		-0.14	20	19	19	24	24	23	28	29	27	30	29	30	33	36	35	39	38	40	39	38	40	39	38	40	39	38	40
		-0.29	18	15	14	20	17	18	27	25	24	33	32	34	36	35	37	39	38	37	39	38	37	39	38	37	39	38	37
		-0.49	13	12	11	16	13	14	22	26	27	25	28	26	28	29	30	33	35	32	33	35	32	33	35	32	33	35	32
		-0.73	9	9	7	11	10	9	15	17	16	20	21	22	25	23	24	28	26	29	28	26	29	28	26	29	28	26	29
		-1.02	2	2	3	4	3	4	9	7	8	11	12	10	13	14	12	13	14	12	13	14	12	13	14	12	13	14	12
Root length
PEG-6000		MPa
		0	7.14	6.14	7.43	6.41	6.71	7.35	7.21	6.27	7.94	7.55
		-0.04	7.64	7.54	6.89	7.01	7.23	6.71	7.59	7.11	6.32	6.53
		-0.14	7.22	7.77	6.35	6.32	7.01	7.33	6.83	6.95	7.01	6.58
		-0.29	6.52	5.93	5.43	5.57	6.52	6.63	5.98	7.01	6.35	5.57
		-0.49	5.54	6.12	6.36	5.62	4.83	5.61	4.62	6.02	6.23	5.11
		-0.73	4.13	3.67	4.98	4.83	4.72	3.42	4.48	5.06	4.58	5.02
		-1.02	2.14	2.31	2.56	2.77	1.98	2.66	2.59	1.87	2.42	2.03
NACL		MPa
		0	7.14	6.14	7.43	6.41	6.71	7.35	7.21	6.27	7.94	7.55
		-0.04	6.98	7.33	7.01	6.82	7.32	6.98	6.55	6.75	6.89	7.02
		-0.14	6.01	7.01	6.02	6.23	6.89	7.02	6.91	6.55	6.48	6.75
		-0.29	5.59	5.62	7.01	4.38	5.24	5.31	6.71	3.52	5.73	5.28
		-0.49	4.67	4.12	3.35	6.1	3.72	4.52	5.53	4.37	4.62	4.43
		-0.73	3.32	3.35	3.62	1.73	2.48	2.85	3.37	4.05	3.86	2.87
		-1.02	2.71	1.23	1.83	2.37	1.39	1.85	2.02	1.75	1.88	1.73
Bud length
PEG-6000		MPa
		0	10.99	11.32	10.52	9.82	11.67	8.73	9.98	10.63	9.58	11.23
		-0.04	9.32	9.98	9.01	8.01	9.37	9.28	9.24	8.82	10.33	9.65
		-0.14	8.79	7.32	8.17	8.32	8.39	7.33	8.01	10.34	8.58	7.32
		-0.29	7.54	6.23	7.58	7.55	7.45	6.98	7.26	7.84	6.96	7.55
		-0.49	5.54	5.38	5.62	5.55	5.34	6.17	4.98	4.32	5.36	5.1
		-0.73	2.38	2.57	2.55	2.68	2.62	3.14	3.21	2.96	2.84	2.38
		-1.02	1.73	1.86	1.76	1.94	1.88	1.95	2.03	1.87	1.92	2.11
NACL		MPa
		0	10.99	11.32	10.52	9.82	11.67	8.73	9.98	10.63	9.58	11.23
		-0.04	9.25	7.09	8.58	7.87	8.43	9.02	8.73	8.64	8.28	7.44
		-0.14	7.75	7.24	7.63	7.64	8.21	6.71	6.59	8.01	7.52	8.43
		-0.29	6.73	6.47	6.91	6.09	8	7.49	7.77	7.21	7.03	6.58
		-0.49	5.92	6.07	6.23	5.66	5.23	5.74	5.38	5.96	5.57	5.34
		-0.73	4.81	4.71	4.37	4.48	4.25	5.74	4.42	4.63	3.13	4.23
		-1.02	4.72	3.15	2.98	2.49	2.13	3.32	1.92	2.33	3.62	3.86
