# Supplementary material for: Effects of drought and salt stress on seed germination and seedling growth of Elymus nutans
Source: PeerJ. 2023 Aug 24;11:e15968. doi: 10.7717/peerj.15968 (PMC10460566; doi:10.7717/peerj.15968)
Supplement: Supplemental Information 2 [file peerj-11-15968-s002.xlsx]

## Sheet: Sheet1
NACL
Plant height Average	Days
cm											Weekly growth rate																							Solution NACL
MPa		0	-0.04	-0.14	-0.29	-0.49	-0.73	-1.02																										EWP	RL	RSA	RV
	7	8.73	8.52	7.56	6.73	4.12	1.01	0.56			Week	MPa	0			-0.04			-0.14			-0.29			-0.49			-0.73			-1.02			MPa	cm	cm\+(2)	cm\+(3)
	8	10.93	9.52	9.12	7.73	5.21	1.34	0.98			1	1.2443	0.0258	aA	1.2181	0.0143	aA	1.0933	0.0119	bB	0.9371	0.0258	cC	0.589	0.015	dD	0.1486	0.0038	eE	0.0824	0.0151	fF		0	52.5732	5.0268	0.07759
	9	11.35	10.12	9.98	8.98	6.34	3.12	1.97			2	0.7719	0.0143	bB	0.5648	0.0095	dD	0.6148	0.0237	cdCD	0.6362	0.0179	abAB	0.7486	0.0225	bcdBCD	0.9462	0.0252	aA	0.6657	0.021	cdCD		0	54.4299	5.56992	0.07195
	10	12.43	10.79	10.54	10.13	6.97	3.53	2.31			3	0.4695	0.053	dD	0.6086	0.0346	bcB	0.6071	0.0151	abcABC	0.6448	0.0227	abAB	0.5552	0.0315	bcdBCD	0.6967	0.0371	aA	0.5262	0.025	cdCD		0	51.0562	5.78186	0.08406
	11	13.01	11.23	10.87	10.52	7.63	4.47	3.31			4	0.2057	0.0734	bcdBC	0.111	0.0293	dC	0.1348	0.0166	dC	0.17	0.0488	cdBC	0.3281	0.0488	abAB	0.2895	0.0674	bcABC	0.4576	0.0527	aA		-0.04	80.6709	9.37289	0.12326
	12	13.53	11.76	11.25	10.87	8.73	5.57	4.12																										-0.04	78.5197	9.04798	0.10042
	13	13.98	12.03	11.86	10.96	9.12	6.65	4.83																										-0.04	77.0127	8.4516	0.09675
	14	14.02	12.43	12.04	11.04	9.43	7.49	5.13																										-0.14	94.1696	10.9703	0.14185
	15	14.79	12.95	12.43	11.1	9.72	7.98	5.51																										-0.14	93.6462	10.7131	0.1257
	16	15.12	13.69	12.93	11.56	9.79	8.64	5.64																										-0.14	89.2683	10.1597	0.12545
	17	15.63	14.15	13.78	12.97	10.12	9.47	5.89																										-0.29	66.0234	7.6921	0.09373
	18	15.73	14.75	14.23	13.68	11.53	10.52	6.34																										-0.29	61.3099	7.6421	0.08275
	19	16.68	15.32	15.01	14.35	12.47	11.62	6.64																										-0.29	65.5523	5.52976	0.08086
	20	17.12	16.68	15.93	15.47	12.98	12.47	7.98																										-0.49	44.0904	4.9349	0.06552
	21	17.23	16.73	16.21	15.64	13.21	12.65	8.96																										-0.49	41.17	4.32822	0.05342
	22	17.45	16.89	16.33	15.98	13.57	12.87	9.56																										-0.49	39.677	3.58468	0.05199
	23	17.72	16.96	16.43	16.17	13.96	13.1	9.98																										-0.73	34.7107	3.07857	0.05141
	24	17.98	17.23	16.57	16.28	14.31	13.27	10.23																										-0.73	27.065	2.87274	0.04225
	25	18.21	17.26	16.85	16.37	14.58	13.57	11.01																										-0.73	24.7666	2.69846	0.04056
	26	18.33	17.34	16.95	16.53	15.1	13.96	11.57																										-1.02	23.9816	2.47551	0.03838
	27	18.41	17.43	17.1	16.65	15.32	14.21	11.86																										-1.02	17.3615	2.11531	0.02691
	28	18.84	17.5167	17.15	16.7167	15.5467	14.5667	12.1233																										-1.02	13.3381	1.71231	0.02334
											Weekly growth rate
PEG-6000											Week	MPa
Plant height Average	Days
cm												0			-0.04			-0.14			-0.29			-0.49			-0.73			-1.02				Solution PEG-6000
MPa		0	-0.04	-0.14	-0.29	-0.49	-0.73	-1.02			1	1.2443	0.0258	aA	1.1643	0.0302	bB	0.93	0.0253	cC	0.5805	0.0184	dD	0.2343	0.0103	eE	0.0919	0.0161	fF	0.0481	0.0064	fF		EWP	RL	RSA	RV
	7	8.73	8.23	6.54	4.01	1.62	0.67	0.34			2	0.7719	0.0143	bcB	0.5362	0.1031	deCD	0.6924	0.0084	bcBC	0.8152	0.0494	bAB	0.9752	0.0443	aA	0.6581	0.0141	cdBC	0.449	0.0258	eD		MPa	cm	cm\+(2)	cm\+(3)
	8	10.93	9.52	8.34	5.42	3.67	0.96	0.58			3	0.4695	0.053	bcAB	0.44	0.0423	bcB	0.4224	0.0095	cB	0.4329	0.0131	cB	0.529	0.0207	abAB	0.4729	0.0457	bcAB	0.5857	0.0293	aA		0	52.5732	5.0268	0.07759
	9	11.35	10.01	8.92	6.52	3.98	1.75	0.96			4	0.2057	0.0734	cBC	0.2905	0.0821	abcABC	0.2448	0.0784	bcABC	0.389	0.0022	abAB	0.1571	0.0446	cC	0.4248	0.0151	aA	0.3862	0.0058	abAB		0	54.4299	5.56992	0.07195
	10	12.43	10.68	9.89	6.97	5.54	3.21	1.72																										0	51.0562	5.78186	0.08406
	11	13.01	10.73	10.32	7.71	6.53	3.61	2.03																										-0.04	74.0268	8.47308	0.10328
	12	13.53	11.11	10.53	8.31	7.23	3.95	2.37																										-0.04	63.5783	6.78592	0.09509
	13	13.98	11.57	10.98	9.47	7.98	4.67	2.74																										-0.04	55.4956	6.63104	0.0885
	14	14.02	11.93	11.32	9.79	8.14	5.23	3.47																										-0.14	54.4514	6.12139	0.08315
	15	14.79	12.57	11.96	10.01	8.35	5.67	4.01																										-0.14	54.2432	6.04421	0.08231
	16	15.12	13.01	12.34	10.35	8.74	5.94	4.37																										-0.14	52.5347	5.96502	0.07058
	17	15.63	13.34	12.68	10.53	9.23	6.67	5.12																										-0.29	51.1481	5.53539	0.06589
	18	15.73	13.96	13.05	11.18	10.51	7.12	5.74																										-0.29	48.7625	4.86962	0.06531
	19	16.68	14.23	13.57	11.98	11.25	7.98	6.23																										-0.29	47.7656	4.7668	0.0649
	20	17.12	14.52	13.86	12.48	11.76	8.35	7.38																										-0.49	42.5197	4.30891	0.06285
	21	17.23	14.98	14.32	12.84	12.01	8.86	7.56																										-0.49	40.618	4.00183	0.04707
	22	17.45	15.12	14.57	13.21	12.17	9.55	7.74																										-0.49	39.409	3.07992	0.03784
	23	17.72	15.57	14.84	13.56	12.36	9.87	8.12																										-0.73	38.5406	3.05802	0.03598
	24	17.98	16.23	15.12	13.96	12.84	10.2	8.56																										-0.73	33.5254	2.85146	0.03388
	25	18.21	16.54	15.39	14.15	13.1	10.54	9.12																										-0.73	32.8862	2.81479	0.03316
	26	18.33	16.87	15.68	14.87	13.35	10.87	9.58																										-1.02	29.7765	2.48251	0.03297
	27	18.41	16.96	15.72	15.21	13.58	11.12	10.01																										-1.02	23.8429	2.21937	0.0231
	28	18.84	17.0167	16.0267	15.5233	13.77	11.5333	10.2833																										-1.02	14.7214	1.47695	0.01891
