# Supplementary material for: Effects of drought and salt stress on seed germination and seedling growth of Elymus nutans
Source: PeerJ. 2023 Aug 24;11:e15968. doi: 10.7717/peerj.15968 (PMC10460566; doi:10.7717/peerj.15968)
Supplement: Supplemental Information 3 [file peerj-11-15968-s003.xlsx]

## Sheet: Sheet1
Solution NACL
EWP	LN	LP	LC	RN	RP	RC
MPa	g/kg	g/kg	g/kg	g/kg	g/kg	g/kg
0	21.37	2.15	394.6	11.22	1.71	410.74
0	21.47	2.14	396.75	10.96	1.73	411.63
0	21.98	2.16	396.83	11.47	1.69	410.98
-0.04	23.37	2.88	431.49	13.26	1.81	361.7
-0.04	22.74	2.86	429.87	13.48	1.81	360.27
-0.04	23.13	2.79	433.56	13.14	1.82	363.78
-0.14	23.44	3.03	468.59	10.63	1.81	358.5
-0.14	23.56	3.07	468.94	10.88	1.84	357.92
-0.14	23.67	3.06	466.38	10.76	1.83	358.71
-0.29	26.18	3.66	424.76	10.55	1.85	348.37
-0.29	25.87	3.59	426.83	10.43	1.87	347.72
-0.29	26.71	3.74	429.67	10.52	1.84	347.26
-0.49	28.69	3.19	385.35	10.14	1.74	343.98
-0.49	27.94	3.15	388.72	10.13	1.76	342.77
-0.49	28.32	3.21	383.56	10.18	1.74	343.51
-0.73	30.06	2.92	363.22	9.83	1.66	318.81
-0.73	29.67	2.96	361.72	9.73	1.66	316.99
-0.73	30.54	3.01	365.42	9.82	1.64	317.65
-1.02	27.74	2.74	361.04	9.32	1.54	287.1
-1.02	28.67	2.69	358.72	9.09	1.53	289.21
-1.02	27.58	2.78	359.27	9.06	1.53	288.56
Solution PEG-6000
EWP	LN	LP	LC	RN	RP	RC
MPa	g/kg	g/kg	g/kg	g/kg	g/kg	g/kg
0	21.37	2.15	394.6	11.22	1.71	410.74
0	21.47	2.14	396.75	10.96	1.73	411.63
0	21.98	2.16	396.83	11.47	1.69	410.98
-0.04	18.42	2.64	407.34	9.1	1.77	390.08
-0.04	18.96	2.63	406.54	9.08	1.75	392.74
-0.04	18.37	2.67	405.38	9.32	1.79	393.21
-0.14	19.58	3.02	413.8	8.73	1.85	347.54
-0.14	19.78	3.08	412.46	8.48	1.84	346.87
-0.14	19.74	3.12	414.59	8.96	1.83	348.21
-0.29	21.35	3.48	424.95	8.18	1.87	342.54
-0.29	20.96	3.51	426.37	8.26	1.87	341.97
-0.29	21.23	3.49	422.57	8.06	1.89	340.78
-0.49	21.78	3.64	434.35	7.7	1.62	328.13
-0.49	21.96	3.63	436.35	7.96	1.61	327.64
-0.49	22.03	3.66	435.76	7.88	1.61	336.72
-0.73	24.17	4.04	451.73	7.68	1.57	294.79
-0.73	23.78	4.07	498.52	7.57	1.56	293.31
-0.73	24.51	4.08	452.37	7.53	1.56	292.77
-1.02	29.62	3.41	462.97	7.1	1.51	286.63
-1.02	29.48	3.38	464.98	7.15	1.5	288.63
-1.02	29.24	3.57	460.76	6.98	1.5	284.52
