# Supplementary material for: Effects of drought and salt stress on seed germination and seedling growth of Elymus nutans
Source: PeerJ. 2023 Aug 24;11:e15968. doi: 10.7717/peerj.15968 (PMC10460566; doi:10.7717/peerj.15968)
Supplement: Supplemental Information 5 [file peerj-11-15968-s005.xlsx]

## Sheet: Sheet1
Solution NACL
EWP	RL	RSA	RV	RN	H	LN	LP	LC	RN	RP	RC
MPa	cm	cm\+(2)	cm\+(3)		cm	g/kg	g/kg	g/kg	g/kg	g/kg	g/kg
0	52.5732	5.0268	0.07759	0.07759	18.78	21.37	2.15	394.6	11.22	1.71	410.74
0	54.4299	5.56992	0.07195	0.07195	19.21	21.47	2.14	396.75	10.96	1.73	411.63
0	51.0562	5.78186	0.08406	0.08406	18.53	21.98	2.16	396.83	11.47	1.69	410.98
-0.04	80.6709	9.37289	0.12326	146	17.56	23.37	2.88	431.49	13.26	1.81	361.7
-0.04	78.5197	9.04798	0.10042	129	17.78	22.74	2.86	429.87	13.48	1.81	360.27
-0.04	77.0127	8.4516	0.09675	128	17.21	23.13	2.79	433.56	13.14	1.82	363.78
-0.14	94.1696	10.9703	0.14185	290	17.23	23.44	3.03	468.59	10.63	1.81	358.5
-0.14	93.6462	10.7131	0.1257	181	17.14	23.56	3.07	468.94	10.88	1.84	357.92
-0.14	89.2683	10.1597	0.12545	155	17.08	23.67	3.06	466.38	10.76	1.83	358.71
-0.29	66.0234	7.6921	0.09373	110	16.87	26.18	3.66	424.76	10.55	1.85	348.37
-0.29	61.3099	7.6421	0.08275	109	16.56	25.87	3.59	426.83	10.43	1.87	347.72
-0.29	65.5523	5.52976	0.08086	100	16.72	26.71	3.74	429.67	10.52	1.84	347.26
-0.49	44.0904	4.9349	0.06552	89	15.43	28.69	3.19	385.35	10.14	1.74	343.98
-0.49	41.17	4.32822	0.05342	87	15.43	27.94	3.15	388.72	10.13	1.76	342.77
-0.49	39.677	3.58468	0.05199	68	15.78	28.32	3.21	383.56	10.18	1.74	343.51
-0.73	34.7107	3.07857	0.05141	59	14.37	30.06	2.92	363.22	9.83	1.66	318.81
-0.73	27.065	2.87274	0.04225	56	14.32	29.67	2.96	361.72	9.73	1.66	316.99
-0.73	24.7666	2.69846	0.04056	53	15.01	30.54	3.01	365.42	9.82	1.64	317.65
-1.02	23.9816	2.47551	0.03838	53	12.03	27.74	2.74	361.04	9.32	1.54	287.1
-1.02	17.3615	2.11531	0.02691	52	11.96	28.67	2.69	358.72	9.09	1.53	289.21
-1.02	13.3381	1.71231	0.02334	47	12.38	27.58	2.78	359.27	9.06	1.53	288.56
Solution PEG-6000
EWP	RL	RSA	RV	RN	H	LN	LP	LC	RN	RP	RC
MPa	cm	cm\+(2)	cm\+(3)		cm	g/kg	g/kg	g/kg	g/kg	g/kg	g/kg
0	52.5732	5.0268	0.07759	0.07759	18.78	21.37	2.15	394.6	11.22	1.71	410.74
0	54.4299	5.56992	0.07195	0.07195	19.21	21.47	2.14	396.75	10.96	1.73	411.63
0	51.0562	5.78186	0.08406	0.08406	18.53	21.98	2.16	396.83	11.47	1.69	410.98
-0.04	74.0268	8.47308	0.10328	452	17.34	18.42	2.64	407.34	9.1	1.77	390.08
-0.04	63.5783	6.78592	0.09509	437	17.13	18.96	2.63	406.54	9.08	1.75	392.74
-0.04	55.4956	6.63104	0.0885	265	16.58	18.37	2.67	405.38	9.32	1.79	393.21
-0.14	54.4514	6.12139	0.08315	214	15.92	19.58	3.02	413.8	8.73	1.85	347.54
-0.14	54.2432	6.04421	0.08231	193	15.67	19.78	3.08	412.46	8.48	1.84	346.87
-0.14	52.5347	5.96502	0.07058	161	16.49	19.74	3.12	414.59	8.96	1.83	348.21
-0.29	51.1481	5.53539	0.06589	161	15.58	21.35	3.48	424.95	8.18	1.87	342.54
-0.29	48.7625	4.86962	0.06531	139	15.37	20.96	3.51	426.37	8.26	1.87	341.97
-0.29	47.7656	4.7668	0.0649	134	15.62	21.23	3.49	422.57	8.06	1.89	340.78
-0.49	42.5197	4.30891	0.06285	129	13.21	21.78	3.64	434.35	7.7	1.62	328.13
-0.49	40.618	4.00183	0.04707	126	13.68	21.96	3.63	436.35	7.96	1.61	327.64
-0.49	39.409	3.07992	0.03784	125	12.92	22.03	3.66	435.76	7.88	1.61	336.72
-0.73	38.5406	3.05802	0.03598	124	11.72	24.17	4.04	451.73	7.68	1.57	294.79
-0.73	33.5254	2.85146	0.03388	114	11.52	23.78	4.07	498.52	7.57	1.56	293.31
-0.73	32.8862	2.81479	0.03316	88	11.36	24.51	4.08	452.37	7.53	1.56	292.77
-1.02	29.7765	2.48251	0.03297	86	10.22	29.62	3.41	462.97	7.1	1.51	286.63
-1.02	23.8429	2.21937	0.0231	77	10.37	29.48	3.38	464.98	7.15	1.5	288.63
-1.02	14.7214	1.47695	0.01891	70	10.26	29.24	3.57	460.76	6.98	1.5	284.52
